# Supplementary material for: Maneuvering target tracking using fuzzy logic-based recursive least squares filter
Source: Springer Nature journal article supplement (doi:10.1186/1687-6180-2014-53), 2014-04-16

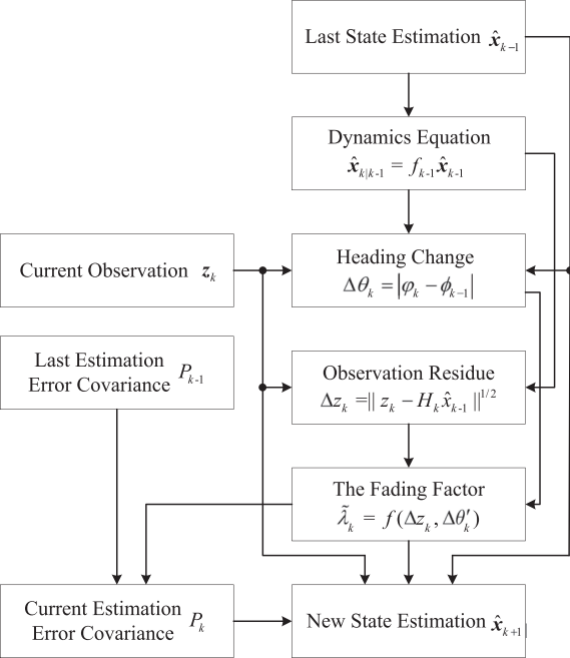

Supplement: 13634_2013_618_MOESM4_ESM.pdf [file 13634_2013_618_MOESM4_ESM.pdf]
